# Supplementary material for: Histamine H2-Receptor Antagonists Improve Non-Steroidal Anti-Inflammatory Drug-Induced Intestinal Dysbiosis
Source: MDPI journal article supplement (doi:10.3390/ijms21218166), 2020-10-31
Supplement: s1 [file s1]

Supplementary Figure

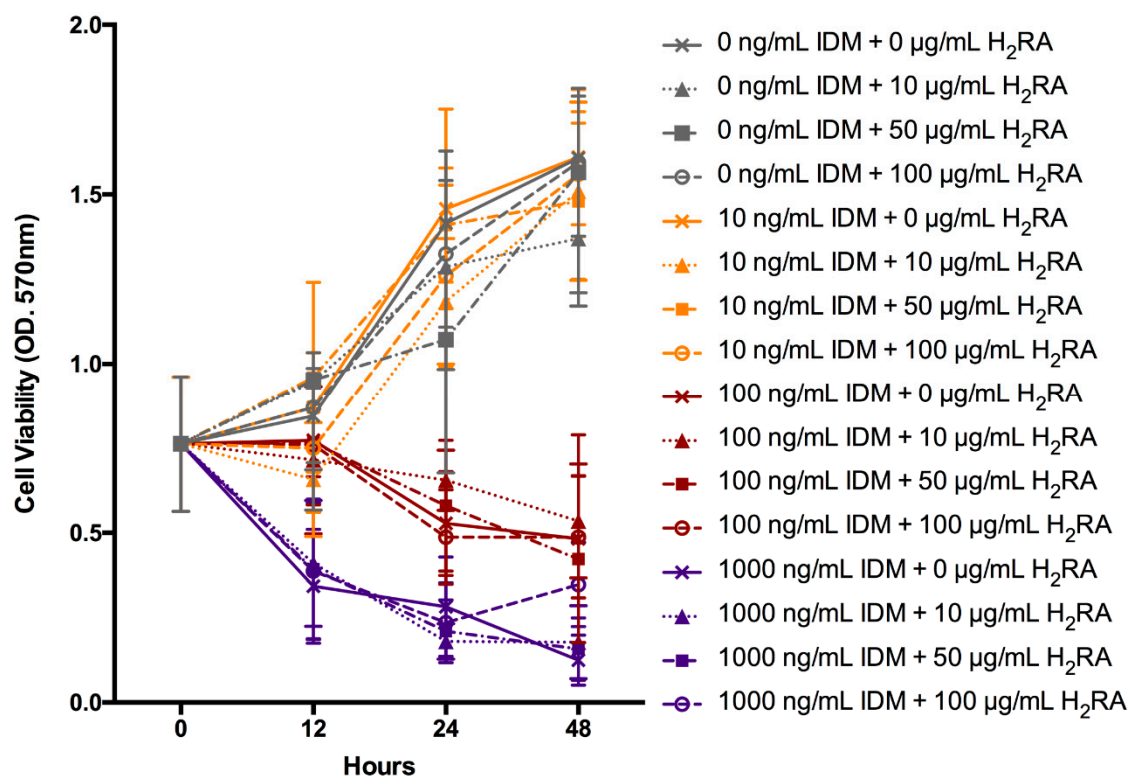

**Supplementary Figure S1.** Pharmacological interference experiments of Indometacin (IDM) and histamine H<sub>2</sub>-receptor antagonists (H<sub>2</sub>RA) on intestinal epithelial cells. The cell viability of the human colonic carcinoma cell line Caco-2 subjected to IDM and H<sub>2</sub>RA was evaluated. Statistical analysis was performed using a two-way ANOVA with Tukey's post-hoc test. \* $p < 0.05$ , \*\* $p < 0.01$ , \*\*\* $p < 0.001$ .
